# Supplementary material for: Electrochemically fabricated electrochromic films from 4-(N-carbazolyl)triphenylamine and its dimethoxy derivative
Source: Royal Society of Chemistry journal article supplement (doi:10.1039/c6ra08528h), 2016-01-01
Supplement: c6ra08528h1.pdf [file c6ra08528h1.pdf]

## Supporting Information

### Electrochemically fabricated electrochromic films from 4-(*N*-carbazolyl)triphenylamine and its dimethoxy derivative

Sheng-Huei Hsiao\* and Hui-Min Wang

*Department of Chemical Engineering and Biotechnology, National Taipei University of Technology,*

*Taipei, Taiwan, E-mail: [shhsiao@ntut.edu.tw](mailto:shhsiao@ntut.edu.tw)*

#### List of Contents for Supplementary Material:

---

**Fig. S1** IR spectra of monomers **TPACz** and **MeOTPACz**.

**Fig. S2** (a) <sup>1</sup>H and (b) <sup>13</sup>C NMR spectra of **TPACz** in CDCl<sub>3</sub>.

**Fig. S3** (a) <sup>1</sup>H and (b) <sup>13</sup>C NMR spectra of **MeOTPACz** in CDCl<sub>3</sub>.

**Fig. S4** (a) H-H COSY and (b) C-H HMQC spectra of **TPACz** in DMSO-*d*<sub>6</sub>.

**Fig. S5** (a) H-H COSY and (b) C-H HMQC spectra of **MeOTPACz** in DMSO-*d*<sub>6</sub>.

**Fig. S6** UV-Vis absorption and PL spectra of the dilute solutions of (a) **TPACz** and **PTPACz** (b) **MeOTPACz** and **(MeOTPACz)<sub>2</sub>** in CH<sub>2</sub>Cl<sub>2</sub> (1 x 10<sup>-5</sup> M).

**Fig. S7** UV-vis spectra of (a) **TPACz** monomer and (b) **PTPACz** in CHCl<sub>2</sub> solution, and (c) **PTPACz** on the ITO/glass surface.

**Fig. S8** Optimized geometry and spatial distributions of the HOMO and LUMO for **TPACz**.

**Table S1** Bond lengths [Å] and bond angles [°] for **TPACz** and **MeOTPACz**

**Scheme S1** Anodic oxidation pathways of (a) **PTPACz** and (b) **(MeOTPACz)<sub>2</sub>**.

## Chemical oxidative polymerization

**PTPACz** could also be prepared by the chemical oxidative polymerization of **TPACz** with  $\text{FeCl}_3$  as an oxidant. In a 50-mL two-necked round-bottom flask equipped with a stirring bar under nitrogen atmosphere, a mixture of **TPACz** (0.41 g, 1 mmol),  $\text{FeCl}_3$  (0.40 g, 2.5 mmol) in nitrobenzene (2 mL) was stirred at room temperature for 24 h. The reaction mixture was poured into methanol containing 10% hydrochloric acid. The precipitate was collected and washed thoroughly with aqueous ammonium hydroxide. The crude polymer (0.33 g, 80 % yield) was re-dissolved in chloroform. After removing the insoluble fraction by filtration, the filtrate was condensed and poured into methanol. The resulting precipitate was washed with methanol and dried under reduced pressure to yield the polymer **PTPACz** (0.25 g, 61 % yield).

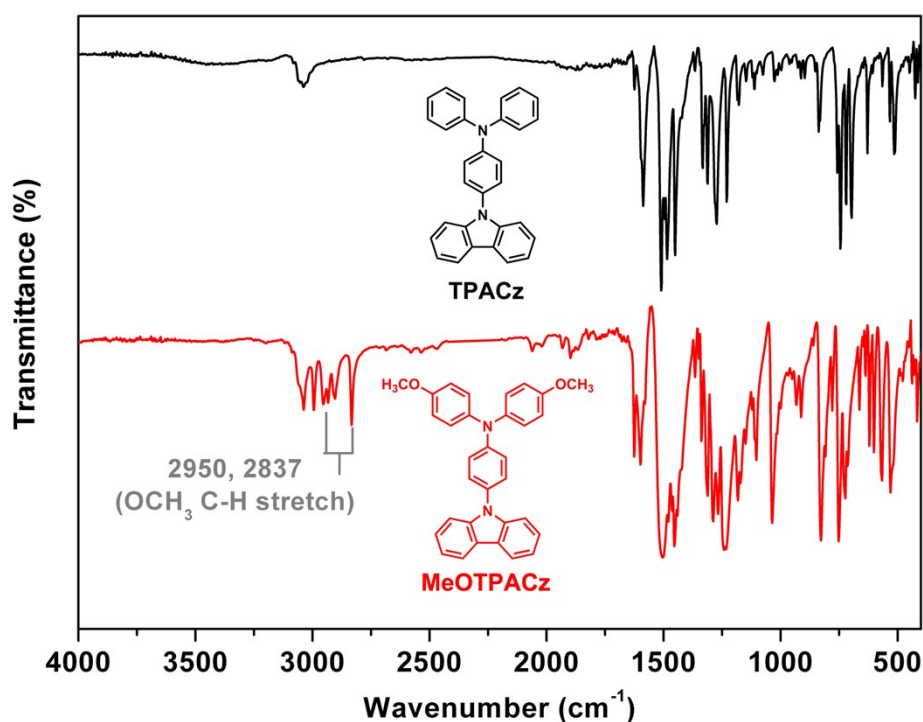

Fig. S1 IR spectra of monomers **TPACz** and **MeOTPACz**.

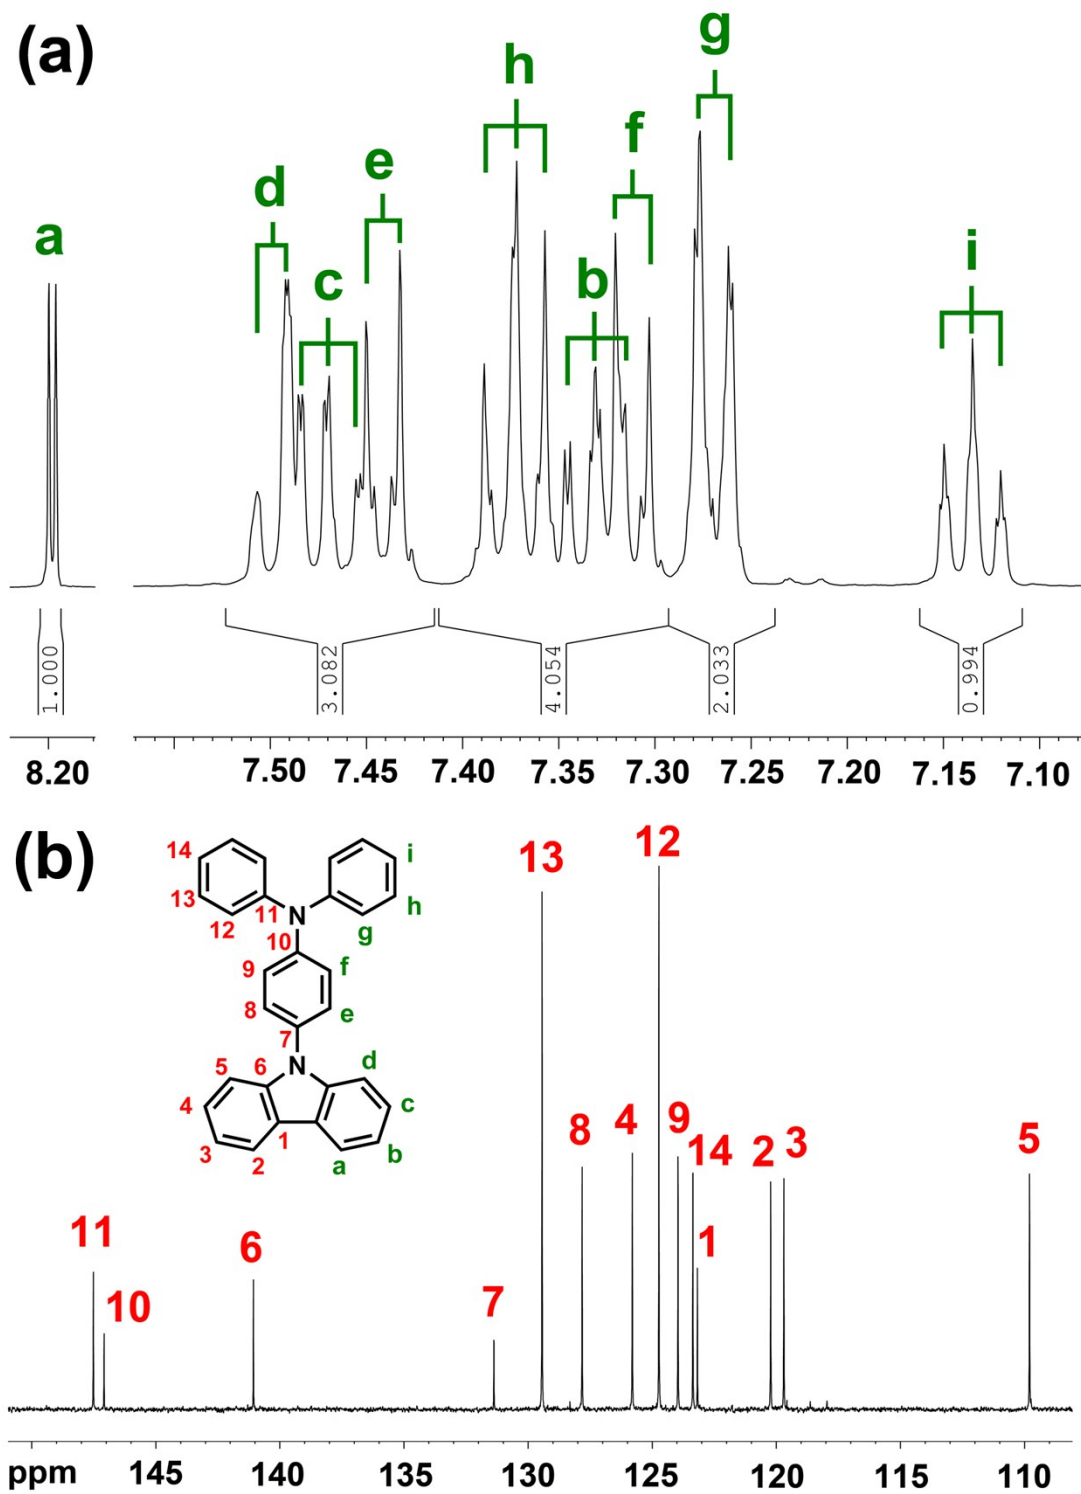

Fig. S2 (a)  $^1\text{H}$  and (b)  $^{13}\text{C}$  NMR spectra of TPACz in  $\text{CDCl}_3$ .

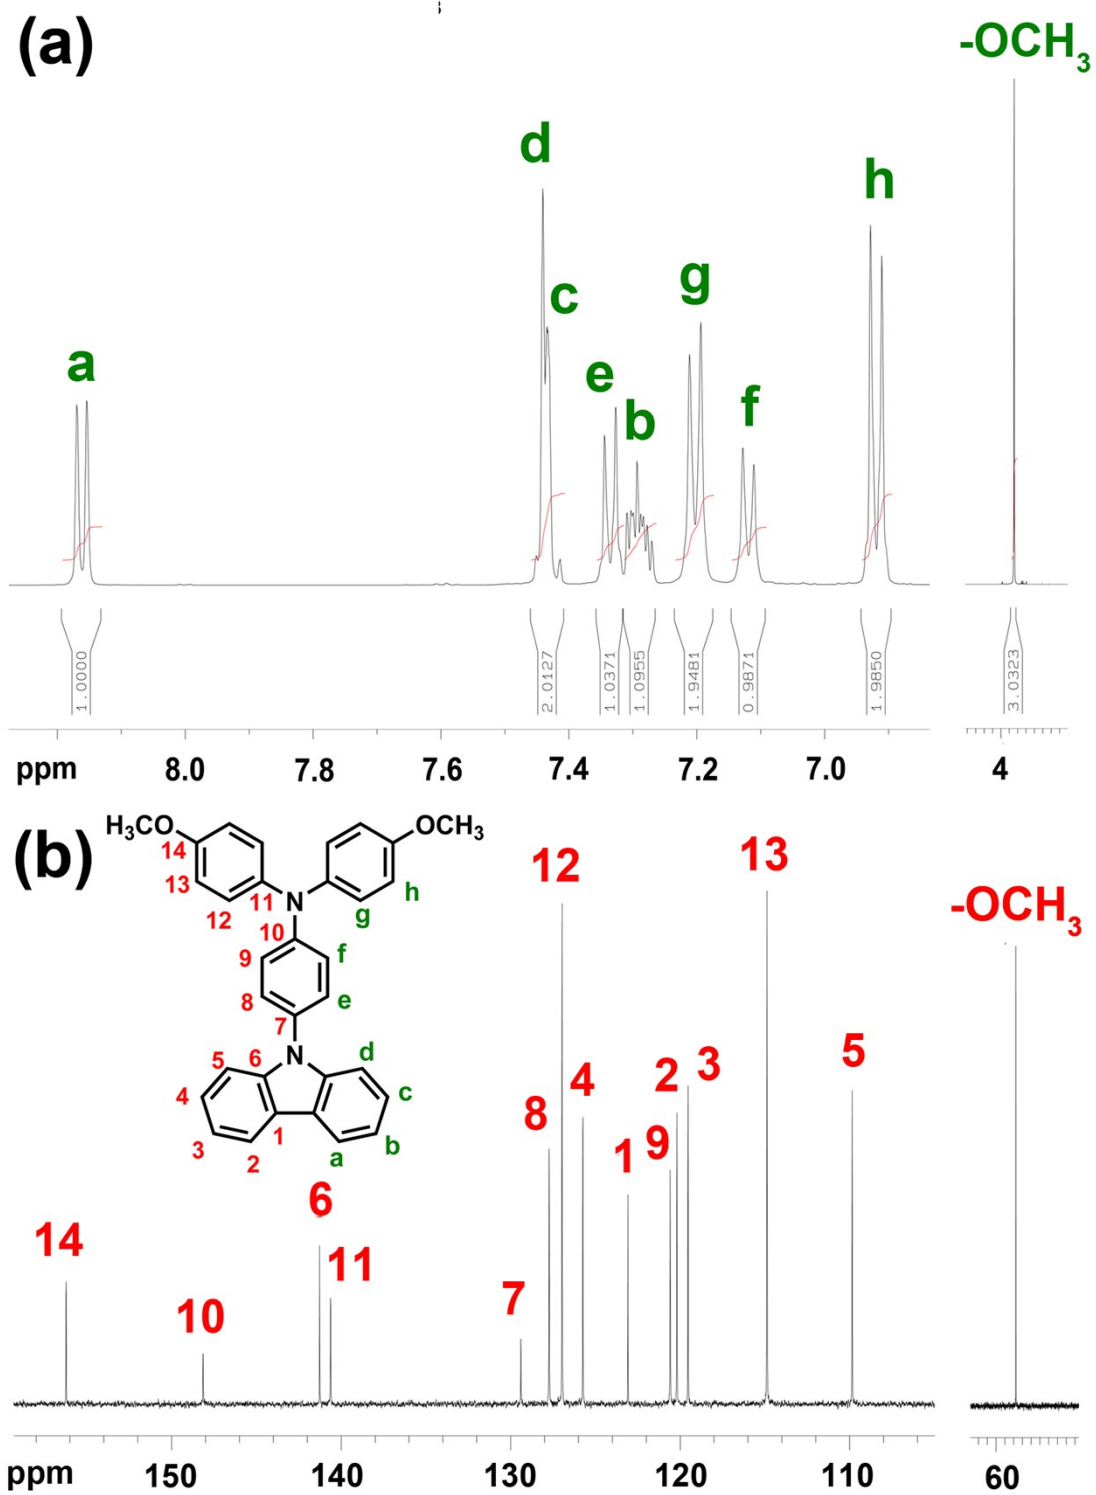

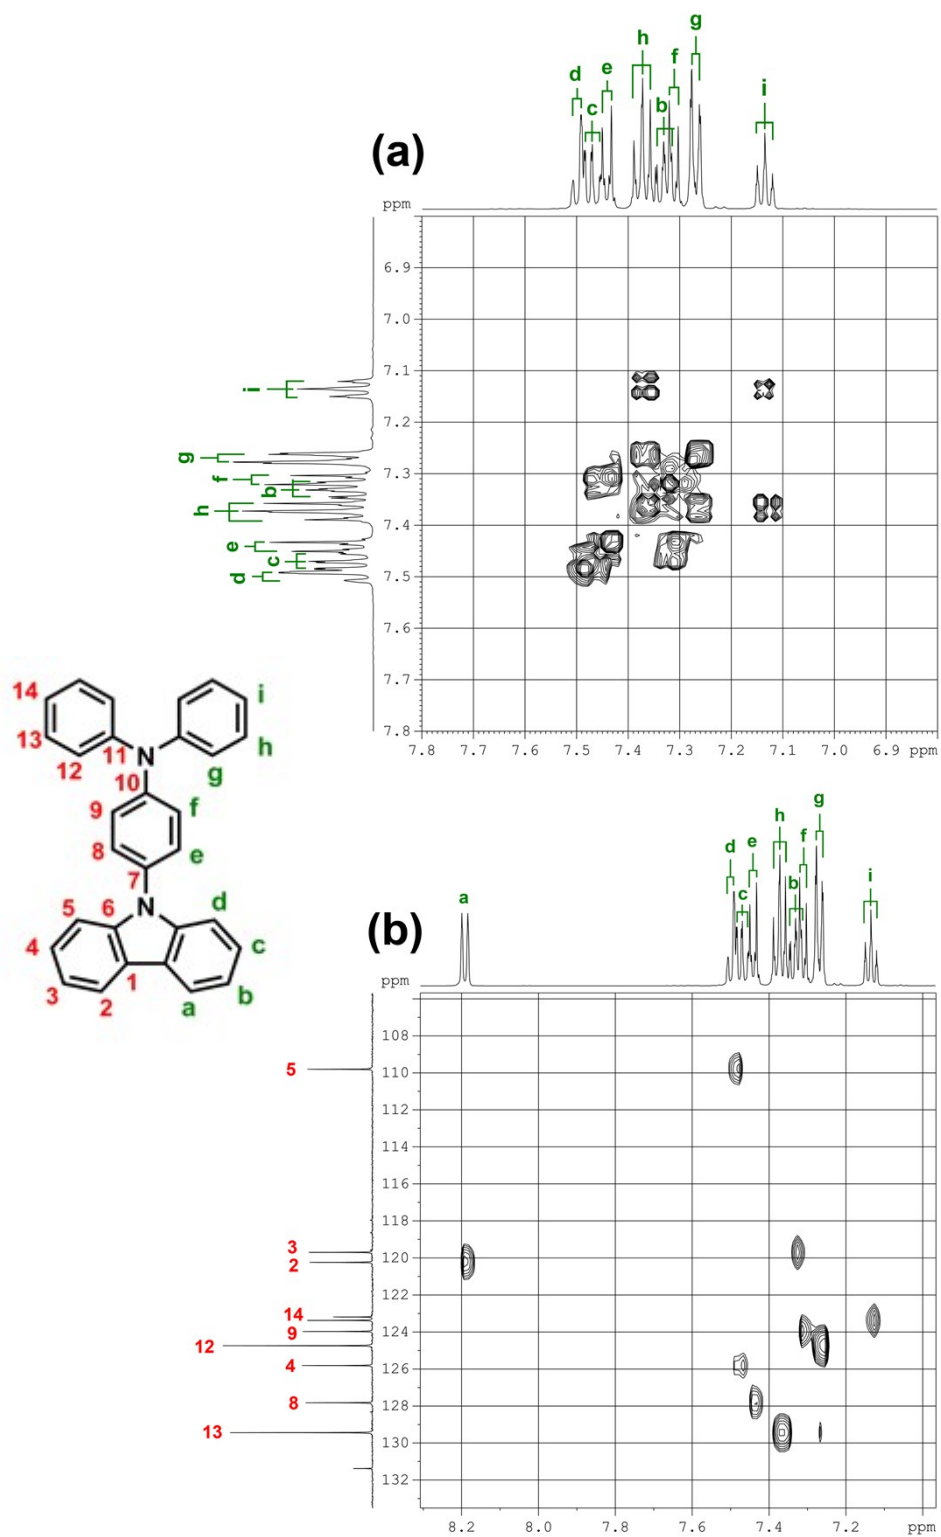

Fig. S4 (a) H-H COSY and (b) C-H HMQC spectra of TPACz in DMSO- $d_6$ .

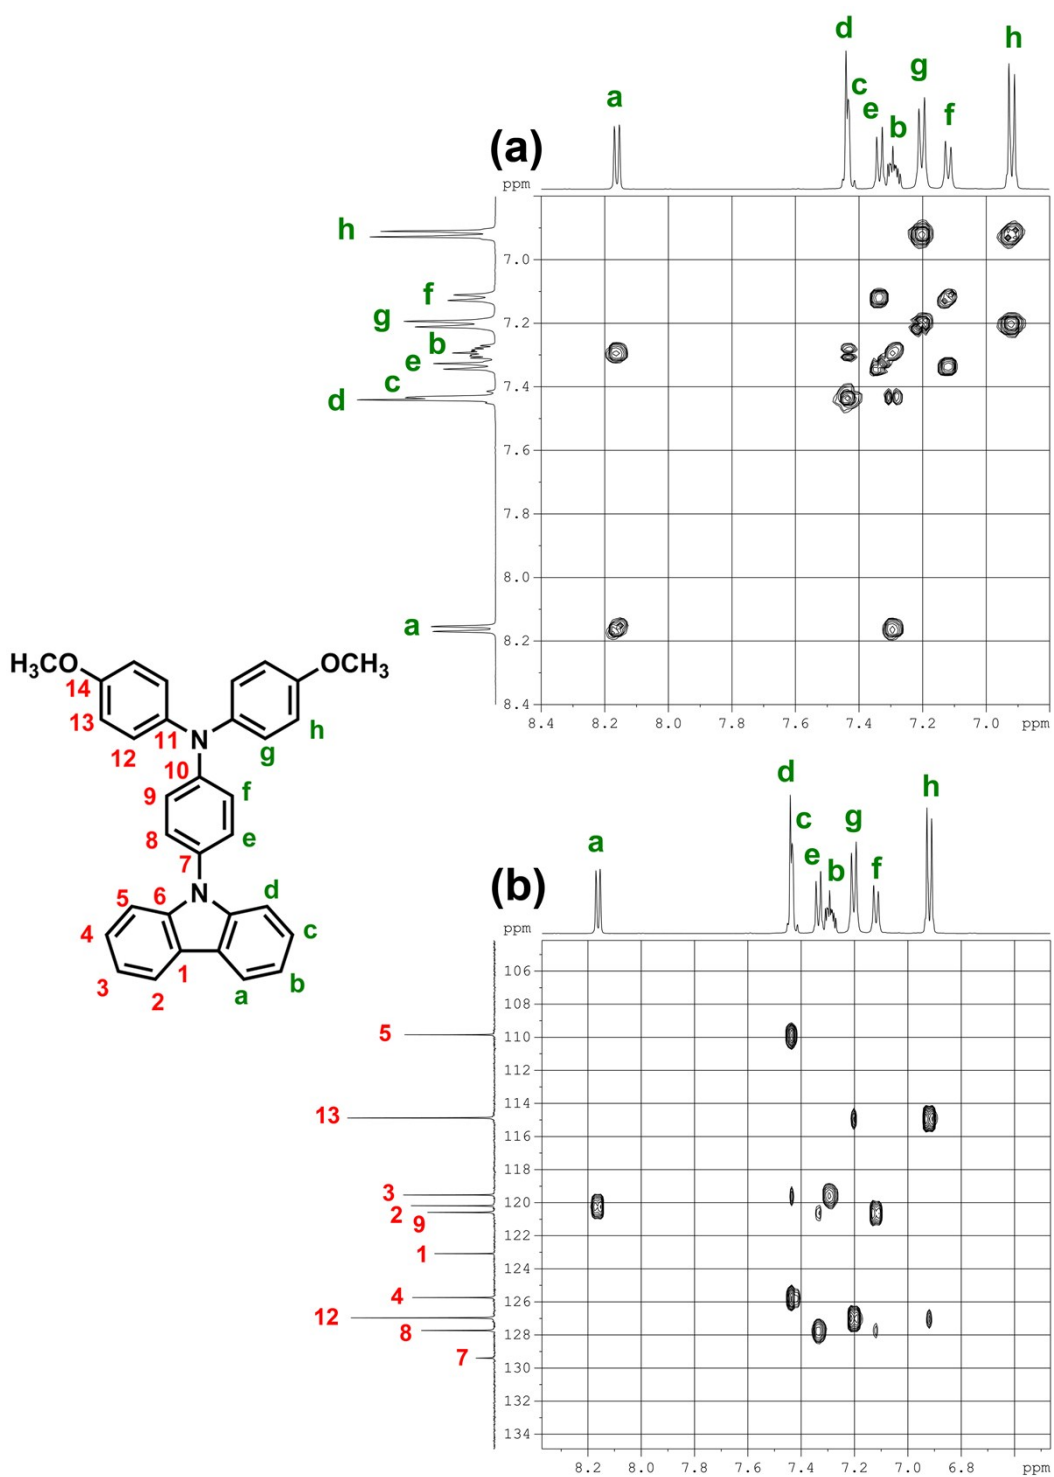

Fig. S5 (a) H-H COSY and (b) C-H HMQC spectra of MeOTPACz in DMSO- $d_6$ .

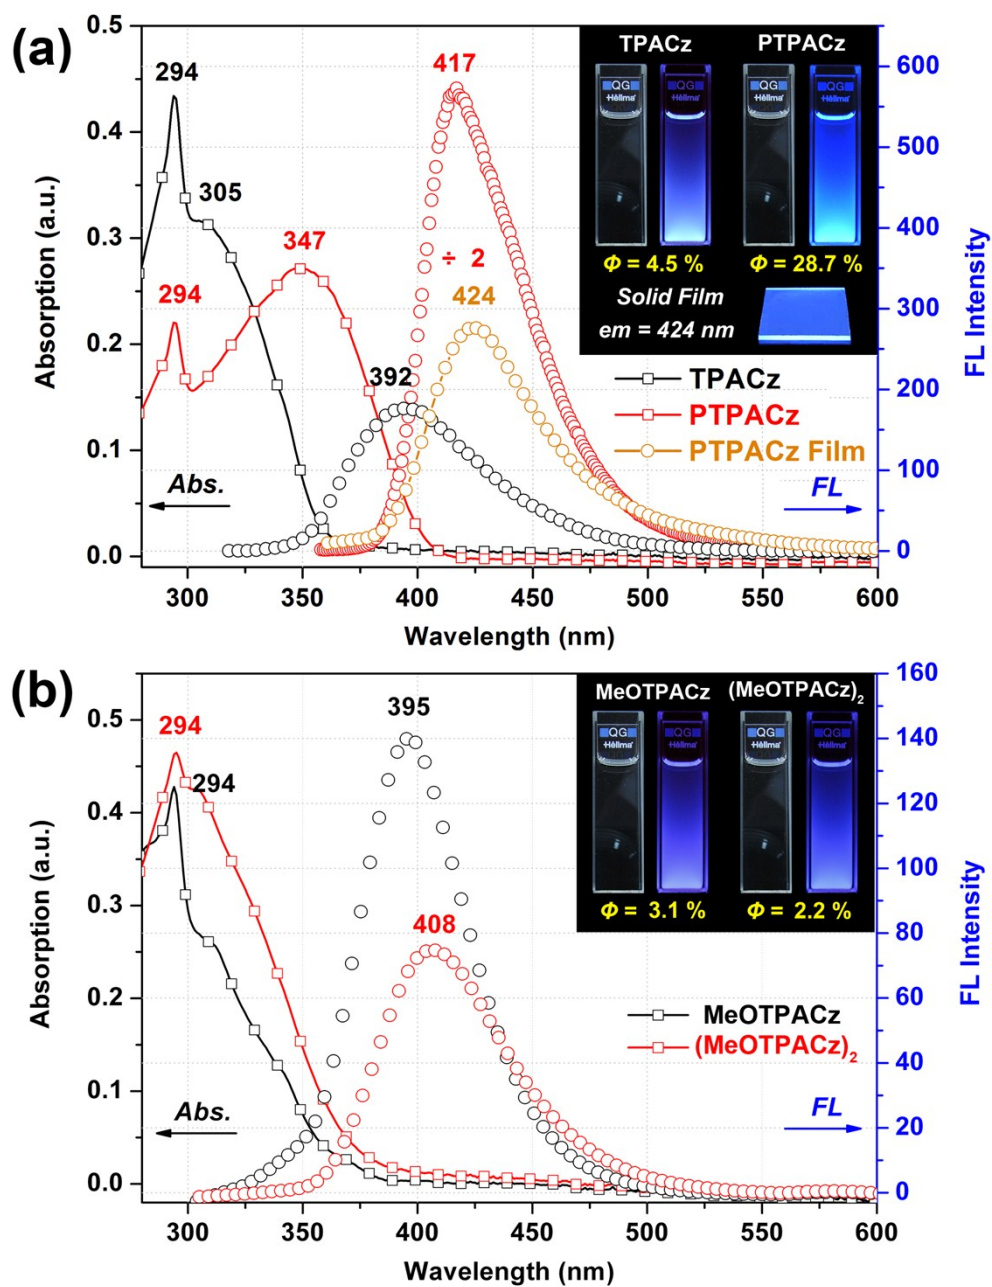

**Fig. S6** UV-Vis absorption and PL spectra of the dilute solutions of (a) **TPACz** and **PTPACz** (b) **MeOTPACz** and **(MeOTPACz)<sub>2</sub>** in  $\text{CH}_2\text{Cl}_2$  ( $1 \times 10^{-5}$  M). Quinine sulfate dissolved in 1 M  $\text{H}_2\text{SO}_4$  (aq.) with a concentration of  $1 \times 10^{-5}$  M as the standard ( $\Phi_F = 54.6\%$ ). Photos show PL images of the solutions upon UV exposure (excited at 365 nm).

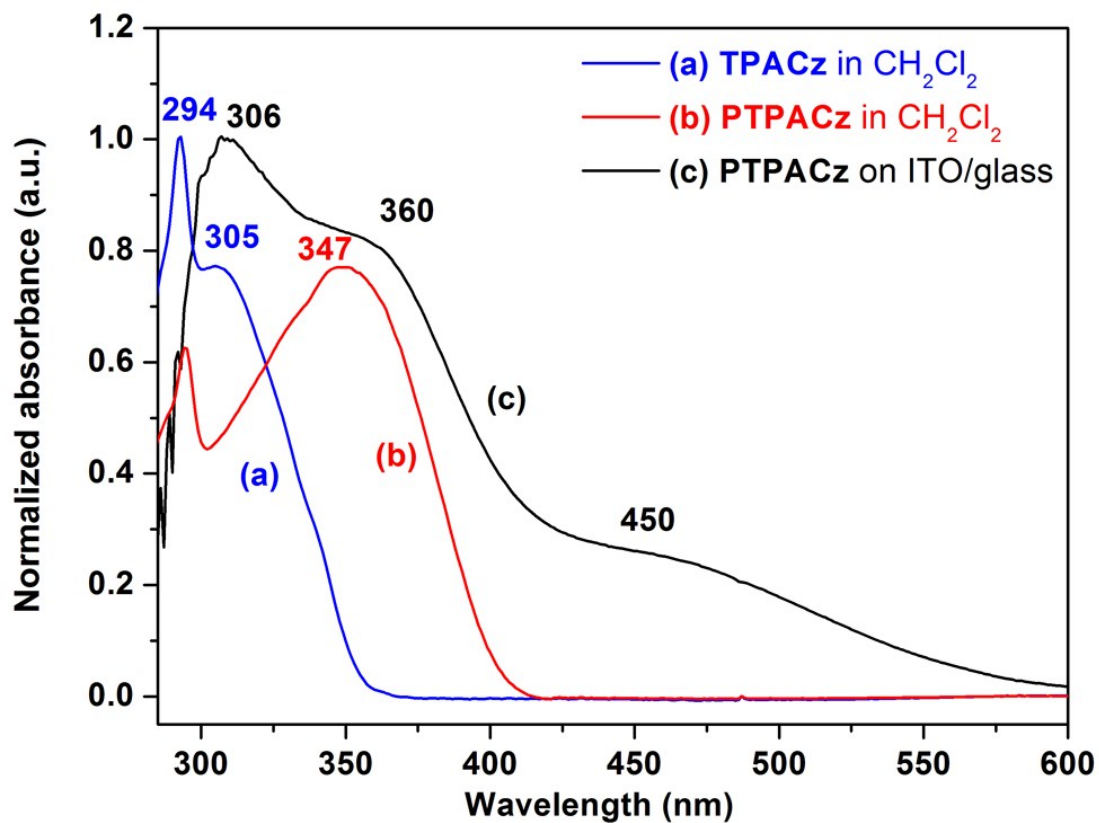

Fig. S7 UV-vis spectra of (a) TPACz monomer and (b) PTPACz in CHCl<sub>2</sub> solution, and (c) PTPACz on the ITO/glass surface.

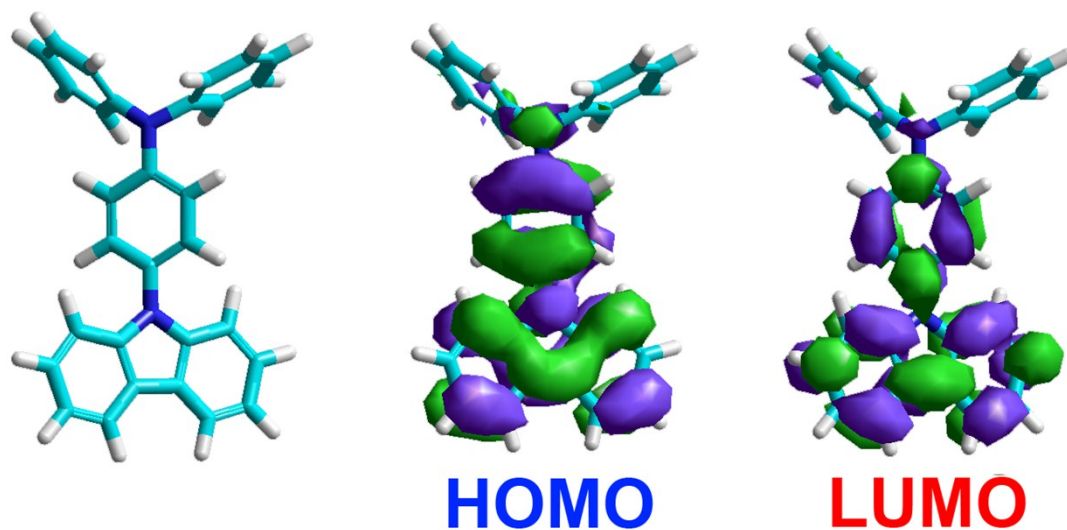

Fig. S8 Optimized geometry and spatial distributions of the HOMO and LUMO for TPACz.



**Table S1** Bond lengths [ $\text{\AA}$ ] and bond angles [ $^\circ$ ] for **TPACz** and **MeOTPACz**

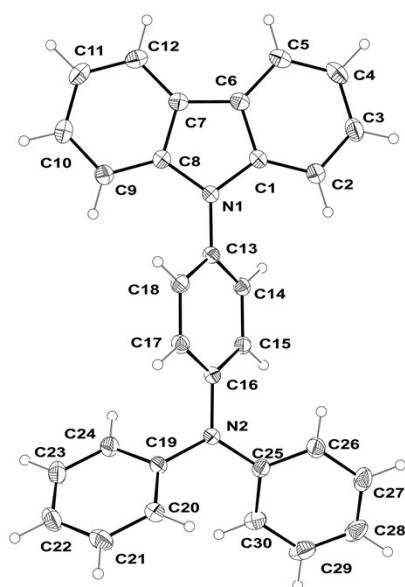

**TPACz**

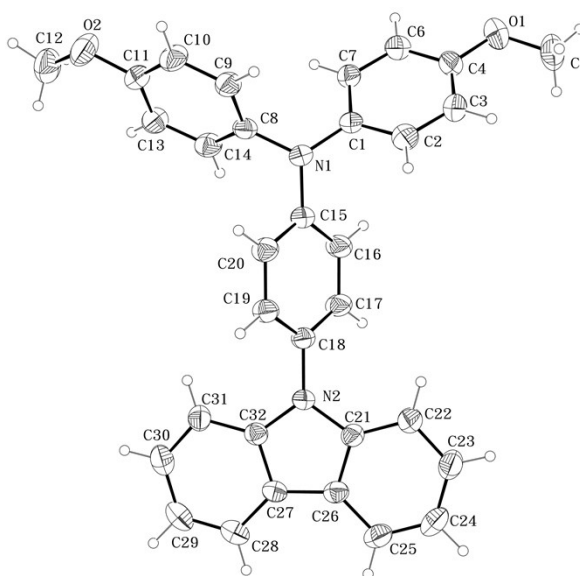

**MeOTPACz**

| <b>TPACz</b>                  |            |                          |            |
|-------------------------------|------------|--------------------------|------------|
| Bond lengths [ $\text{\AA}$ ] |            | Bond angles [ $^\circ$ ] |            |
| C(1)-C(2)                     | 1.3925(19) | C(2)-C(1)-N(1)           | 129.62(12) |
| C(1)-N(1)                     | 1.3965(17) | C(2)-C(1)-C(6)           | 121.64(13) |
| C(1)-C(6)                     | 1.4118(18) | (1)-C(1)-C(6)            | 108.71(12) |
| C(2)-C(3)                     | 1.382(2)   | C(3)-C(2)-C(1)           | 117.66(14) |
| C(2)-H(2)                     | 0.95       | C(3)-C(2)-H(2)           | 121.2      |
| C(3)-C(4)                     | 1.393(2)   | C(1)-C(2)-H(2)           | 121.2      |
| C(3)-H(3)                     | 0.95       | C(2)-C(3)-C(4)           | 121.52(15) |
| C(4)-C(5)                     | 1.378(2)   | C(2)-C(3)-H(3)           | 119.2      |
| C(4)-H(4)                     | 0.95       | C(4)-C(3)-H(3)           | 119.2      |
| C(5)-C(6)                     | 1.3960(19) | C(5)-C(4)-C(3)           | 120.74(14) |
| C(5)-H(5)                     | 0.95       | C(5)-C(4)-H(4)           | 119.6      |
| C(6)-C(7)                     | 1.4421(19) | C(3)-C(4)-H(4)           | 119.6      |
| C(7)-C(12)                    | 1.3988(19) | C(4)-C(5)-C(6)           | 119.39(14) |
| C(7)-C(8)                     | 1.4041(18) | C(4)-C(5)-H(5)           | 120.3      |
| C(8)-C(9)                     | 1.3903(19) | C(6)-C(5)-H(5)           | 120.3      |
| C(8)-N(1)                     | 1.4012(16) | C(5)-C(6)-C(1)           | 119.03(13) |
| C(9)-C(10)                    | 1.3810(19) | C(5)-C(6)-C(7)           | 133.84(13) |
| C(9)-H(9)                     | 0.95       | C(1)-C(6)-C(7)           | 107.12(12) |
| C(10)-C(11)                   | 1.393(2)   | C(12)-C(7)-C(8)          | 119.21(13) |

|             |            |                   |            |
|-------------|------------|-------------------|------------|
| C(10)-H(10) | 0.95       | C(12)-C(7)-C(6)   | 133.86(13) |
| C(11)-C(12) | 1.372(2)   | C(8)-C(7)-C(6)    | 106.91(11) |
| C(11)-H(11) | 0.95       | C(9)-C(8)-N(1)    | 129.28(12) |
| C(12)-H(12) | 0.95       | C(9)-C(8)-C(7)    | 121.59(12) |
| C(13)-C(18) | 1.3866(18) | N(1)-C(8)-C(7)    | 109.07(11) |
| C(13)-C(14) | 1.3894(18) | C(10)-C(9)-C(8)   | 117.67(13) |
| C(13)-N(1)  | 1.4231(16) | C(10)-C(9)-H(9)   | 121.2      |
| C(14)-C(15) | 1.3852(17) | C(8)-C(9)-H(9)    | 121.2      |
| C(14)-H(14) | 0.95       | C(9)-C(10)-C(11)  | 121.56(14) |
| C(15)-C(16) | 1.3897(18) | C(9)-C(10)-H(10)  | 119.2      |
| C(15)-H(15) | 0.95       | C(11)-C(10)-H(10) | 119.2      |
| C(16)-C(17) | 1.3913(18) | C(12)-C(11)-C(10) | 120.64(13) |
| C(16)-N(2)  | 1.4222(16) | C(12)-C(11)-H(11) | 119.7      |
| C(17)-C(18) | 1.3845(18) | C(10)-C(11)-H(11) | 119.7      |
| C(17)-H(17) | 0.95       | C(11)-C(12)-C(7)  | 119.31(14) |
| C(18)-H(18) | 0.95       | C(11)-C(12)-H(12) | 120.3      |
| C(19)-C(24) | 1.3866(19) | C(7)-C(12)-H(12)  | 120.3      |
| C(19)-C(20) | 1.3892(19) | C(18)-C(13)-C(14) | 119.19(12) |
| C(19)-N(2)  | 1.4270(17) | C(18)-C(13)-N(1)  | 120.24(12) |
| C(20)-C(21) | 1.380(2)   | C(14)-C(13)-N(1)  | 120.57(12) |
| C(20)-H(20) | 0.95       | C(15)-C(14)-C(13) | 120.62(12) |
| C(21)-C(22) | 1.383(2)   | C(15)-C(14)-H(14) | 119.7      |
| C(21)-H(21) | 0.95       | C(13)-C(14)-H(14) | 119.7      |
| C(22)-C(23) | 1.379(2)   | C(14)-C(15)-C(16) | 120.43(12) |
| C(22)-H(22) | 0.95       | C(14)-C(15)-H(15) | 119.8      |
| C(23)-C(24) | 1.382(2)   | C(16)-C(15)-H(15) | 119.8      |
| C(23)-H(23) | 0.95       | C(15)-C(16)-C(17) | 118.64(12) |
| C(24)-H(24) | 0.95       | C(15)-C(16)-N(2)  | 121.51(12) |
| C(25)-C(30) | 1.3910(19) | C(17)-C(16)-N(2)  | 119.84(12) |
| C(25)-C(26) | 1.3920(19) | C(18)-C(17)-C(16) | 121.03(12) |
| C(25)-N(2)  | 1.4141(16) | C(18)-C(17)-H(17) | 119.5      |
| C(26)-C(27) | 1.386(2)   | C(16)-C(17)-H(17) | 119.5      |
| C(26)-H(26) | 0.95       | C(17)-C(18)-C(13) | 120.08(12) |
| C(27)-C(28) | 1.376(3)   | C(17)-(18)-H(18)  | 120        |
| C(27)-H(27) | 0.95       | C(13)-C(18)-H(18) | 120        |
| C(28)-C(29) | 1.369(2)   | C(24)-C(19)-C(20) | 119.37(13) |
| C(28)-H(28) | 0.95       | C(24)-C(19)-N(2)  | 119.97(13) |

|             |          |                   |            |
|-------------|----------|-------------------|------------|
| C(29)-C(30) | 1.380(2) | C(20)-C(19)-N(2)  | 120.66(13) |
| C(29)-H(29) | 0.95     | C(21)-C(20)-C(19) | 119.94(14) |
| C(30)-H(30) | 0.95     | C(21)-C(20)-H(20) | 120        |
|             |          | C(19)-C(20)-H(20) | 120        |
|             |          | C(20)-C(21)-C(22) | 120.53(15) |
|             |          | C(20)-C(21)-H(21) | 119.7      |
|             |          | C(22)-C(21)-H(21) | 119.7      |
|             |          | C(23)-C(22)-C(21) | 119.61(15) |
|             |          | C(23)-C(22)-H(22) | 120.2      |
|             |          | C(21)-C(22)-H(22) | 120.2      |
|             |          | C(22)-C(23)-C(24) | 120.23(15) |
|             |          | C(22)-C(23)-H(23) | 119.9      |
|             |          | C(24)-C(23)-H(23) | 119.9      |
|             |          | C(23)-C(24)-C(19) | 120.30(14) |
|             |          | C(23)-C(24)-H(24) | 119.8      |
|             |          | C(19)-C(24)-H(24) | 119.8      |
|             |          | C(30)-C(25)-C(26) | 118.61(13) |
|             |          | C(30)-C(25)-N(2)  | 120.34(13) |
|             |          | C(26)-C(25)-N(2)  | 121.05(12) |
|             |          | C(27)-C(26)-C(25) | 119.92(15) |
|             |          | C(27)-C(26)-H(26) | 120        |
|             |          | C(25)-C(26)-H(26) | 120        |
|             |          | C(28)-C(27)-C(26) | 120.95(16) |
|             |          | C(28)-C(27)-H(27) | 119.5      |
|             |          | C(26)-C(27)-H(27) | 119.5      |
|             |          | C(29)-C(28)-C(27) | 119.17(15) |
|             |          | C(29)-C(28)-H(28) | 120.4      |
|             |          | C(27)-C(28)-H(28) | 120.4      |
|             |          | C(28)-C(29)-C(30) | 120.94(16) |
|             |          | C(28)-C(29)-H(29) | 119.5      |
|             |          | C(30)-C(29)-H(29) | 119.5      |
|             |          | C(29)-C(30)-C(25) | 120.40(15) |
|             |          | C(29)-C(30)-H(30) | 119.8      |
|             |          | C(25)-C(30)-H(30) | 119.8      |
|             |          | C(1)-N(1)-C(8)    | 108.19(10) |
|             |          | C(1)-N(1)-C(13)   | 125.76(11) |
|             |          | C(8)-N(1)-C(13)   | 126.05(11) |

|                  |          |                   |            |
|------------------|----------|-------------------|------------|
|                  |          | C(25)-N(2)-C(16)  | 121.29(11) |
|                  |          | C(25)-N(2)-C(19)  | 120.53(10) |
|                  |          | C(16)-N(2)-C(19)  | 118.07(10) |
| <b>MeOTPAz</b>   |          |                   |            |
| Bond lengths [Å] |          | Bond angles [°]   |            |
| C(1)-C(7)        | 1.381(5) | C(7)-C(1)-C(2)    | 117.5(3)   |
| C(1)-C(2)        | 1.385(5) | C(7)-C(1)-N(1)    | 122.4(3)   |
| C(1)-N(1)        | 1.418(4) | C(2)-C(1)-N(1)    | 120.1(3)   |
| C(2)-C(3)        | 1.382(5) | C(3)-C(2)-C(1)    | 121.5(4)   |
| C(2)-H(2)        | 0.93     | C(3)-C(2)-H(2)    | 119.2      |
| C(3)-C(4)        | 1.372(5) | C(1)-C(2)-H(2)    | 119.2      |
| C(3)-H(3)        | 0.93     | C(4)-C(3)-C(2)    | 120.0(3)   |
| C(4)-C(6)        | 1.374(5) | C(4)-C(3)-H(3)    | 120        |
| C(4)-O(1)        | 1.378(4) | C(2)-C(3)-H(3)    | 120        |
| C(5)-O(1)        | 1.415(5) | C(3)-C(4)-C(6)    | 118.9(3)   |
| C(5)-H(5A)       | 0.96     | C(3)-C(4)-O(1)    | 125.1(3)   |
| C(5)-H(5B)       | 0.96     | C(6)-C(4)-O(1)    | 116.1(3)   |
| C(5)-H(5C)       | 0.96     | O(1)-C(5)-H(5A)   | 109.5      |
| C(6)-C(7)        | 1.376(5) | O(1)-C(5)-H(5B)   | 109.5      |
| C(6)-H(6)        | 0.93     | H(5A)-C(5)-H(5B)  | 109.5      |
| C(7)-H(7)        | 0.93     | O(1)-C(5)-H(5C)   | 109.5      |
| C(8)-C(14)       | 1.372(5) | H(5A)-C(5)-H(5C)  | 109.5      |
| C(8)-C(9)        | 1.376(5) | H(5B)-C(5)-H(5C)  | 109.5      |
| C(8)-N(1)        | 1.432(4) | C(4)-C(6)-C(7)    | 121.1(3)   |
| C(9)-C(10)       | 1.376(5) | C(4)-C(6)-H(6)    | 119.4      |
| C(9)-H(9)        | 0.93     | C(7)-C(6)-H(6)    | 119.4      |
| C(10)-C(11)      | 1.381(5) | C(1)-C(7)-C(6)    | 120.8(3)   |
| C(10)-H(10)      | 0.93     | C(1)-C(7)-H(7)    | 119.6      |
| C(11)-O(2)       | 1.373(4) | C(6)-C(7)-H(7)    | 119.6      |
| C(11)-C(13)      | 1.373(5) | C(14)-C(8)-C(9)   | 119.4(3)   |
| C(12)-O(2)       | 1.396(5) | C(14)-C(8)-N(1)   | 120.9(3)   |
| C(12)-H(12A)     | 0.96     | C(9)-C(8)-N(1)    | 119.7(3)   |
| C(12)-H(12B)     | 0.96     | C(8)-C(9)-C(10)   | 120.1(3)   |
| C(12)-H(12C)     | 0.96     | C(8)-C(9)-H(9)    | 120        |
| C(13)-C(14)      | 1.379(5) | C(10)-C(9)-H(9)   | 120        |
| C(13)-H(13)      | 0.93     | C(11)-C(10)-C(9)  | 120.1(3)   |
| C(14)-H(14)      | 0.93     | C(11)-C(10)-H(10) | 119.9      |

|             |          |                     |          |
|-------------|----------|---------------------|----------|
| C(15)-C(20) | 1.378(5) | C(9)-C(10)-H(10)    | 119.9    |
| C(15)-N(1)  | 1.421(4) | C(10)-C(11)-O(2)    | 115.6(3) |
| C(15)-C(16) | 1.382(5) | C(10)-C(11)-C(13)   | 120.1(3) |
| C(16)-C(17) | 1.378(5) | O(2)-C(11)-C(13)    | 124.3(3) |
| C(16)-H(16) | 0.93     | O(2)-C(12)-H(12A)   | 109.5    |
| C(17)-C(18) | 1.375(5) | O(2)-C(12)-H(12B)   | 109.5    |
| C(17)-H(17) | 0.93     | H(12A)-C(12)-H(12B) | 109.5    |
| C(18)-C(19) | 1.380(4) | O(2)-C(12)-H(12C)   | 109.5    |
| C(18)-N(2)  | 1.425(3) | H(12A)-C(12)-H(12C) | 109.5    |
| C(19)-C(20) | 1.386(4) | H(12B)-C(12)-H(12C) | 109.5    |
| C(19)-H(19) | 0.93     | C(14)-C(13)-C(11)   | 119.3(3) |
| C(20)-H(20) | 0.93     | C(14)-C(13)-H(13)   | 120.4    |
| C(21)-C(26) | 1.392(4) | C(11)-C(13)-H(13)   | 120.4    |
| C(21)-N(2)  | 1.398(4) | C(8)-C(14)-C(13)    | 121.0(3) |
| C(21)-C(22) | 1.381(5) | C(8)-C(14)-H(14)    | 119.5    |
| C(22)-C(23) | 1.371(5) | C(13)-C(14)-H(14)   | 119.5    |
| C(22)-H(22) | 0.93     | C(20)-C(15)-N(1)    | 119.2(3) |
| C(23)-C(24) | 1.382(6) | C(20)-C(15)-C(16)   | 118.7(3) |
| C(23)-H(23) | 0.93     | N(1)-C(15)-C(16)    | 122.0(3) |
| C(24)-C(25) | 1.363(6) | C(17)-C(16)-C(15)   | 120.7(3) |
| C(24)-H(24) | 0.93     | C(17)-C(16)-H(16)   | 119.7    |
| C(25)-C(26) | 1.397(5) | C(15)-C(16)-H(16)   | 119.7    |
| C(25)-H(25) | 0.93     | C(16)-C(17)-C(18)   | 120.4(3) |
| C(26)-C(27) | 1.441(4) | C(16)-C(17)-H(17)   | 119.8    |
| C(27)-C(28) | 1.393(4) | C(18)-C(17)-H(17)   | 119.8    |
| C(27)-C(32) | 1.412(4) | C(19)-C(18)-C(17)   | 119.5(3) |
| C(28)-C(29) | 1.367(6) | C(19)-C(18)-N(2)    | 120.1(3) |
| C(28)-H(28) | 0.93     | C(17)-C(18)-N(2)    | 120.4(3) |
| C(29)-C(30) | 1.386(6) | C(18)-C(19)-C(20)   | 119.9(3) |
| C(29)-H(29) | 0.93     | C(18)-C(19)-H(19)   | 120.1    |
| C(30)-C(31) | 1.370(5) | C(20)-C(19)-H(19)   | 120.1    |
| C(30)-H(30) | 0.93     | C(15)-C(20)-C(19)   | 120.8(3) |
| C(31)-C(32) | 1.384(4) | C(15)-C(20)-H(20)   | 119.6    |
| C(31)-H(31) | 0.93     | C(19)-C(20)-H(20)   | 119.6    |
| C(32)-N(2)  | 1.387(4) | C(26)-C(21)-N(2)    | 109.0(3) |
|             |          | C(26)-C(21)-C(22)   | 122.2(3) |
|             |          | N(2)-C(21)-C(22)    | 128.8(3) |

|  |  |                   |          |
|--|--|-------------------|----------|
|  |  | C(23)-C(22)-C(21) | 117.3(3) |
|  |  | C(23)-C(22)-H(22) | 121.4    |
|  |  | C(21)-C(22)-H(22) | 121.4    |
|  |  | C(22)-C(23)-C(24) | 121.3(4) |
|  |  | C(22)-C(23)-H(23) | 119.3    |
|  |  | C(24)-C(23)-H(23) | 119.3    |
|  |  | C(25)-C(24)-C(23) | 121.5(3) |
|  |  | C(25)-C(24)-H(24) | 119.2    |
|  |  | C(23)-C(24)-H(24) | 119.2    |
|  |  | C(24)-C(25)-C(26) | 118.5(3) |
|  |  | C(24)-C(25)-H(25) | 120.7    |
|  |  | C(26)-C(25)-H(25) | 120.7    |
|  |  | C(21)-C(26)-C(25) | 119.1(3) |
|  |  | C(21)-C(26)-C(27) | 107.3(3) |
|  |  | C(25)-C(26)-C(27) | 133.6(3) |
|  |  | C(28)-C(27)-C(32) | 118.8(3) |
|  |  | C(28)-C(27)-C(26) | 134.6(3) |
|  |  | C(32)-C(27)-C(26) | 106.5(3) |
|  |  | C(29)-C(28)-C(27) | 119.3(4) |
|  |  | C(29)-C(28)-H(28) | 120.4    |
|  |  | C(27)-C(28)-H(28) | 120.4    |
|  |  | C(30)-C(29)-C(28) | 120.9(3) |
|  |  | C(30)-C(29)-H(29) | 119.6    |
|  |  | C(28)-C(29)-H(29) | 119.6    |
|  |  | C(29)-C(30)-C(31) | 121.8(4) |
|  |  | C(29)-C(30)-H(30) | 119.1    |
|  |  | C(31)-C(30)-H(30) | 119.1    |
|  |  | C(32)-C(31)-C(30) | 117.6(3) |
|  |  | C(32)-C(31)-H(31) | 121.2    |
|  |  | C(30)-C(31)-H(31) | 121.2    |
|  |  | N(2)-C(32)-C(31)  | 129.5(3) |
|  |  | N(2)-C(32)-C(27)  | 108.9(3) |
|  |  | C(31)-C(32)-C(27) | 121.6(3) |
|  |  | C(15)-N(1)-C(1)   | 120.7(2) |
|  |  | C(15)-N(1)-C(8)   | 117.1(2) |
|  |  | C(1)-N(1)-C(8)    | 119.0(2) |
|  |  | C(21)-N(2)-C(32)  | 108.3(2) |

|  |  |                  |          |
|--|--|------------------|----------|
|  |  | C(21)-N(2)-C(18) | 125.7(2) |
|  |  | C(32)-N(2)-C(18) | 125.8(2) |
|  |  | C(4)-O(1)-C(5)   | 117.2(4) |
|  |  | C(11)-O(2)-C(12) | 119.2(3) |

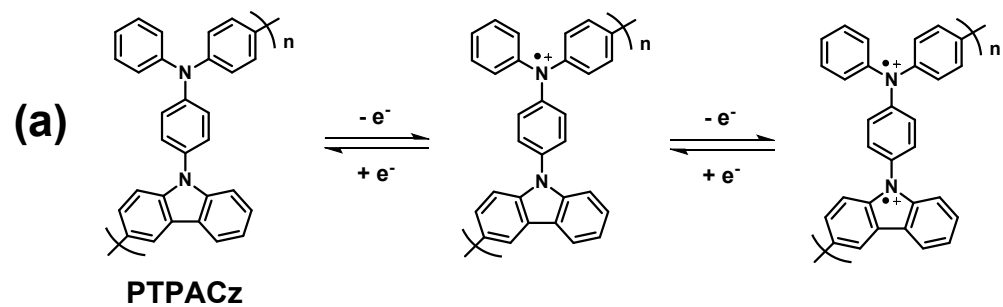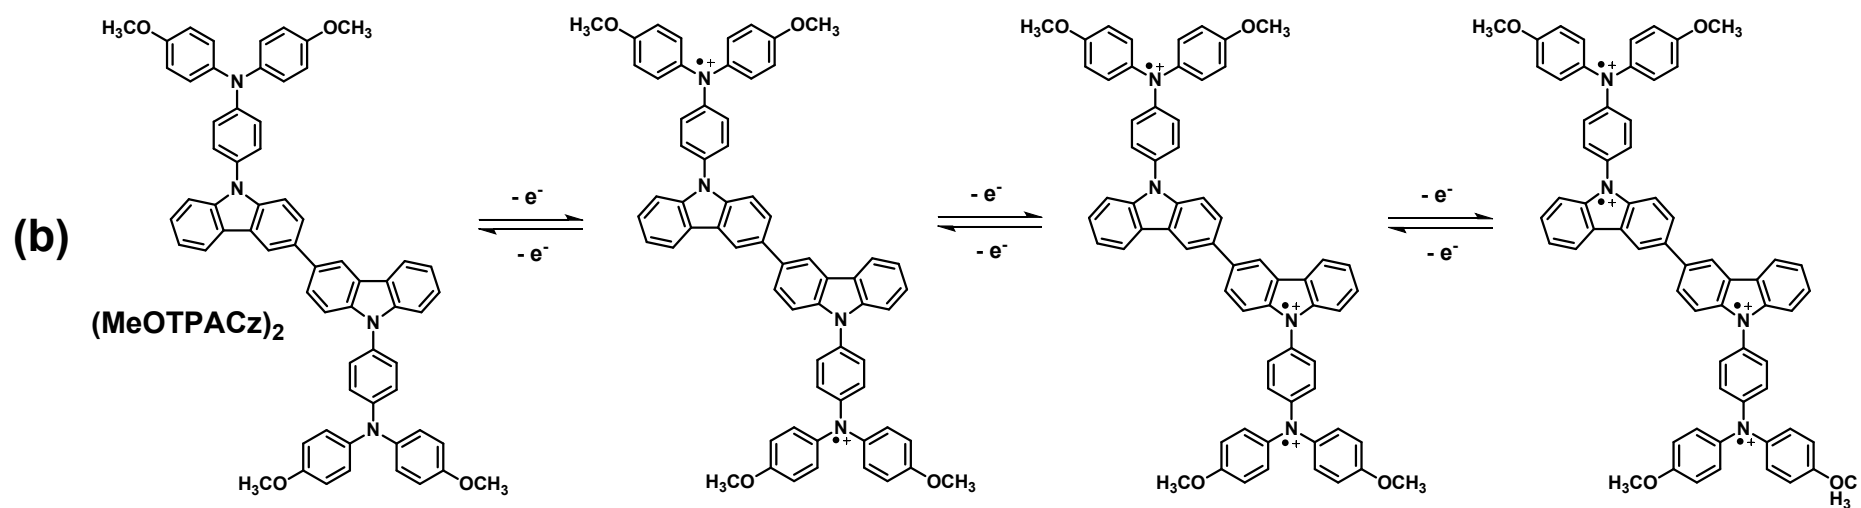

**Scheme S1** Anodic oxidation pathways of (a) PTPACz and (b) (MeOTPACz)<sub>2</sub>.
